# Supplementary material
Source: MDPI journal article supplement (https://www.mdpi.com/2077-1312/11/1/181)

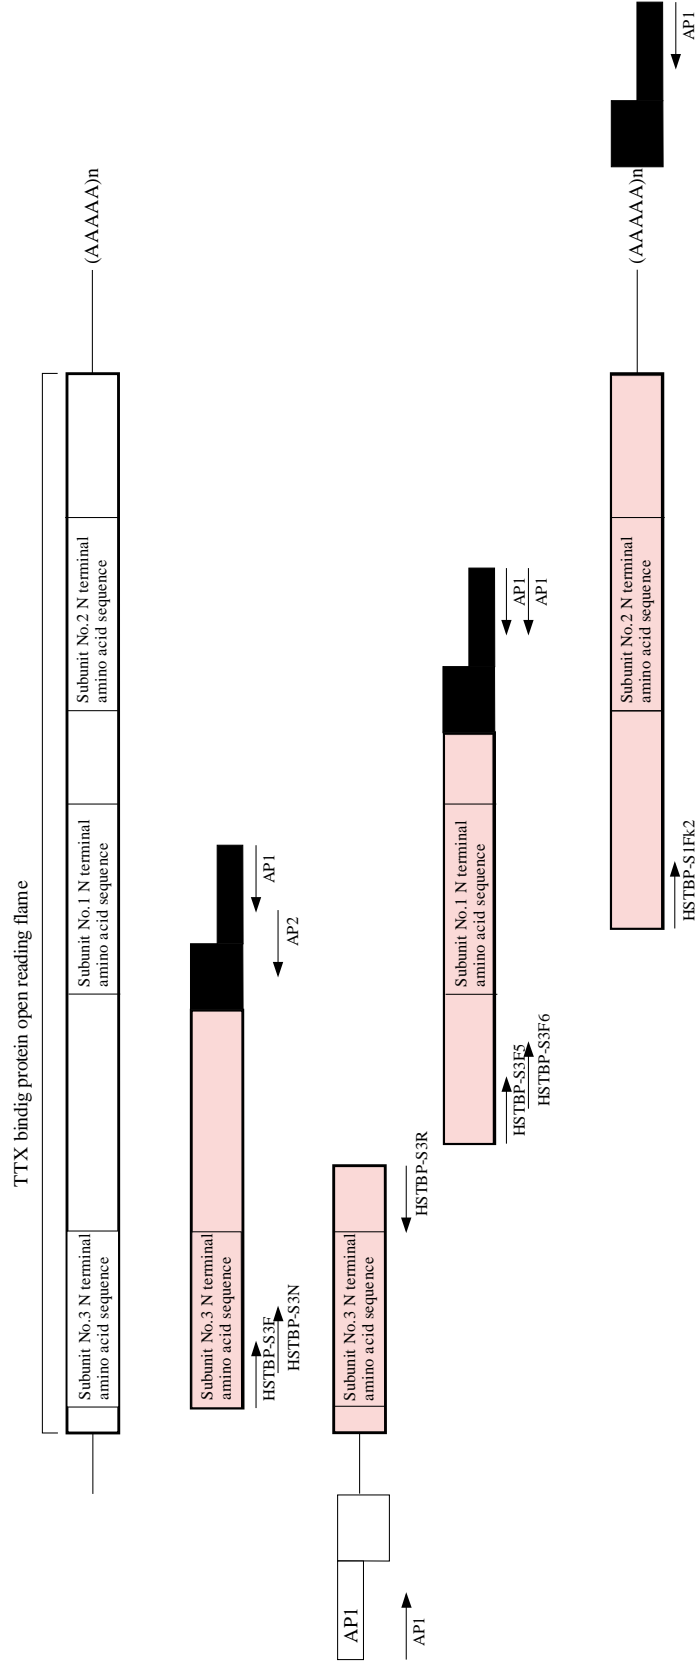

Figure S1. Strategy of 5'-RACE and 3'-RACE of HSTBP

Supplement: s1 [file s1]
